# Supplementary material for: Defects of thin CaO(001) on Mo(001): an EPR spectroscopic perspective
Source: Royal Society of Chemistry journal article supplement (doi:10.1039/d2cp00389a), 2022-01-01
Supplement: d2cp00389a1.pdf [file d2cp00389a1.pdf]

## Supplementary Information for: Defects of thin CaO(001) on Mo(001): an EPR spectroscopic perspective

Richter, N. F., Risse, T.

*Institut für Chemie und Biochemie, Freie Universität Berlin, Arnimallee 22, 14195 Berlin, Germany*

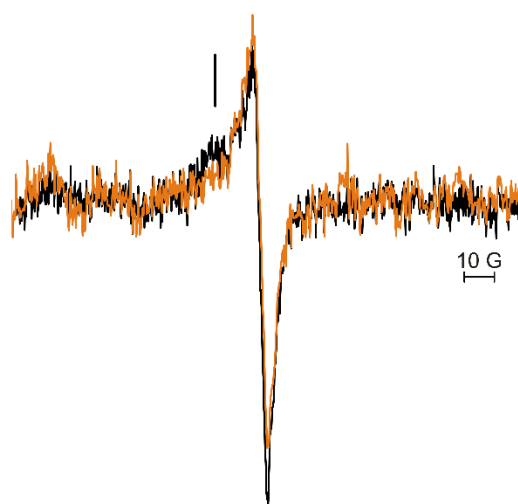

**Fig. S1:** Comparison of the EPR-spectrum of the 15 ML CaO film grown at room temperature with Ca deposition rate of 2.4 Å/min (black trace) and the spectrum resulting after subtraction of the CaO film prepared with 3.6 Å/min Ca deposition rate (orange trace).

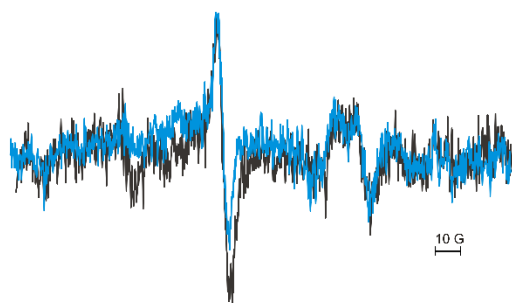

**Fig. S2:** EPR spectra of the 15 ML thick CaO film (Ca deposition rate of 2.4 Å/min) after first annealing to 1030 K (black trace) and subsequent annealing to 1100 K (blue trace)
